# Supplementary material
Source: MDPI journal article supplement (https://www.mdpi.com/2073-4433/12/12/1690)
Supplement: s1 [file s1 › atmosphere-1480940-supplementary.pdf]

# Supplementary Materials: Investigating the Climate-Growth Response of Scots Pine (*Pinus sylvestris* L.) in Northern Poland

Nella Waszak <sup>1,\*</sup>, Iain Robertson <sup>2</sup>, Radosław Puchałka <sup>1,4</sup>, Rajmund Przybylak <sup>3,4</sup>, Aleksandra Pospieszynska <sup>3,4</sup> and Marcin Koprowski <sup>1,4</sup>

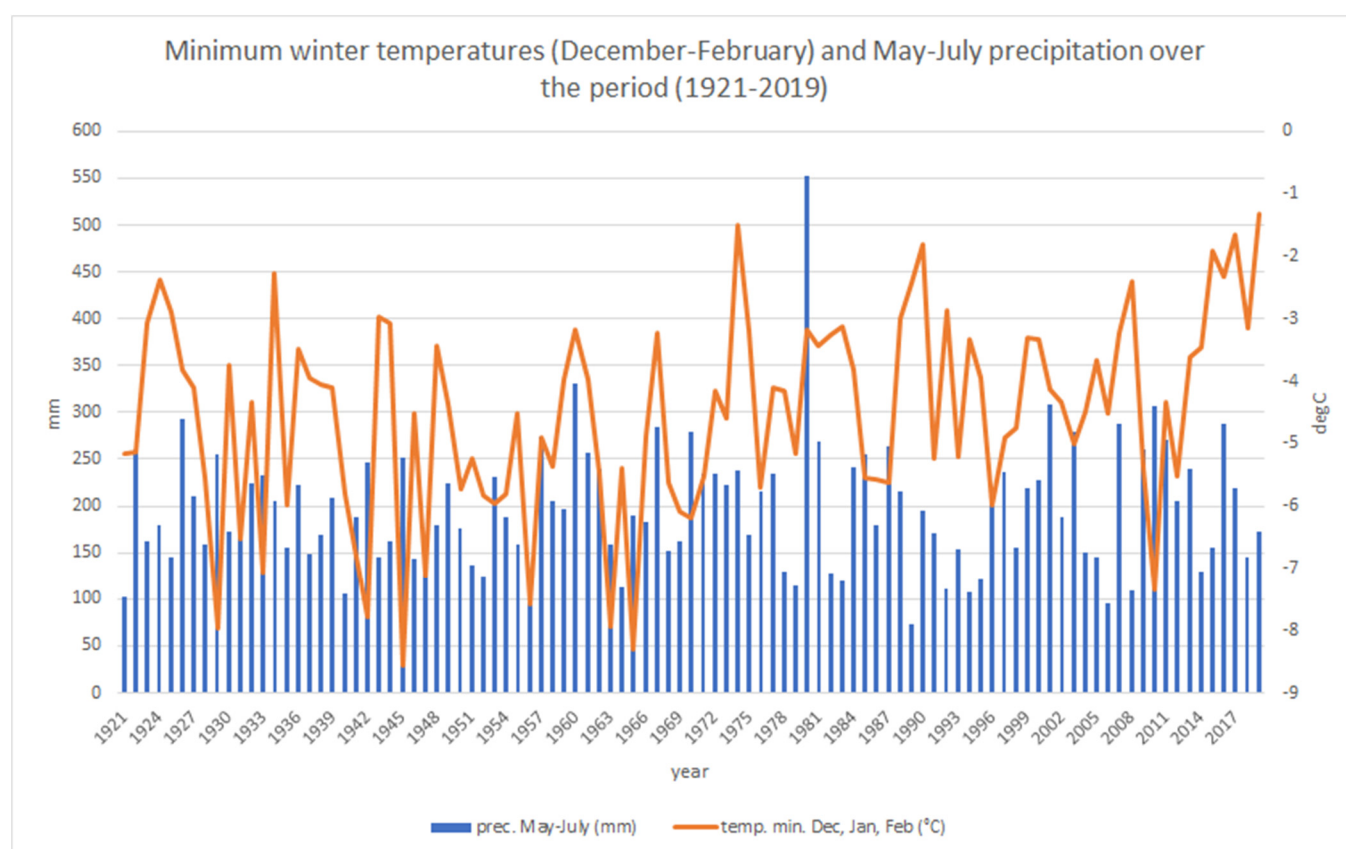

**Figure S1.** Minimum winter temperatures for months December-February (marked by orange line and expressed in degrees celcius) and May-July precipitation (marked in blue lines and expressed in mm) over the period (1921–2019), based on daily data.
